# Supplementary material for: Cytotoxicity of mini gold nanorods: intersection with extracellular vesicles
Source: Royal Society of Chemistry journal article supplement (doi:10.1039/d2na00694d), 2022-12-19
Supplement: d2na00694d1.pdf [file d2na00694d1.pdf]

## Supplementary Material

### Cytotoxicity of mini gold nanorods: intersection with extracellular vesicles

Ábner Magalhães Nunes,<sup>a,b</sup> Priscila Falagan-Lotsch,<sup>a,c</sup> Ayman Roslend,<sup>a</sup> Mario Roberto Meneghetti,<sup>b</sup> and Catherine Jones Murphy<sup>a,\*</sup>

<sup>a</sup> Department of Chemistry, University of Illinois at Urbana-Champaign, 600 S. Mathews Ave., Urbana, IL 61801, USA

<sup>b</sup> Instituto de Química e Biotecnologia, Universidade Federal de Alagoas, Alagoas, 57072-900, Brazil.

<sup>c</sup> Department of Biological Sciences, Auburn University, Auburn, Alabama 36849, USA

\*to whom correspondence should be addressed: [murphycj@illinois.edu](mailto:murphycj@illinois.edu)

\*Corresponding Authors details:

E-mail: [murphycj@illinois.edu](mailto:murphycj@illinois.edu) (C.J.M.)

Phone: +1 217.333.7680

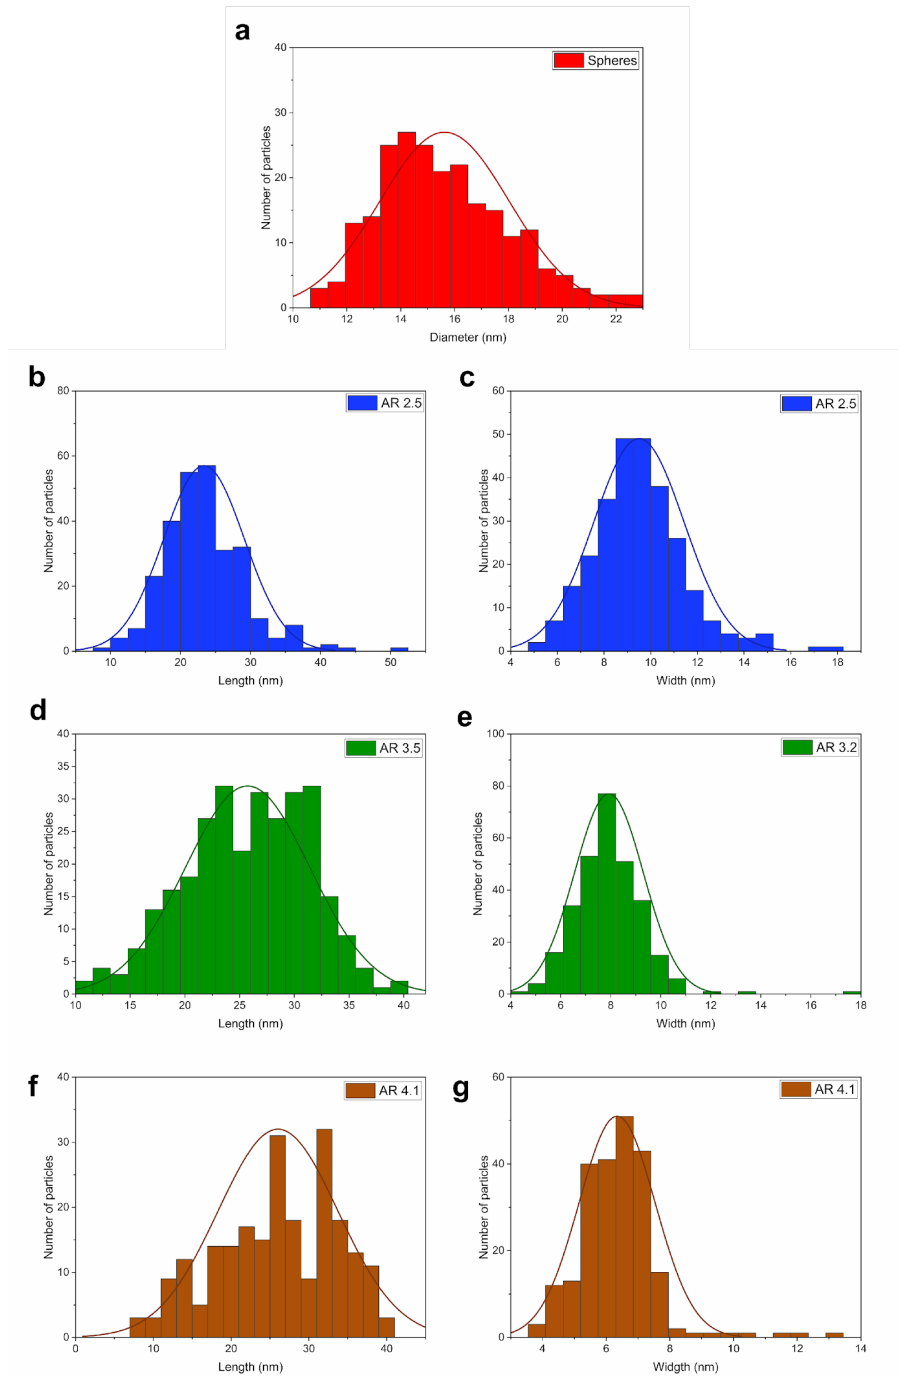

**Figure S1.** Histograms showing the particle size distribution pattern for the (a) spheres and mini gold nanorods: (b,c) AR 2.5; (d,e) AR 3.5; and (f,g) 4.1.

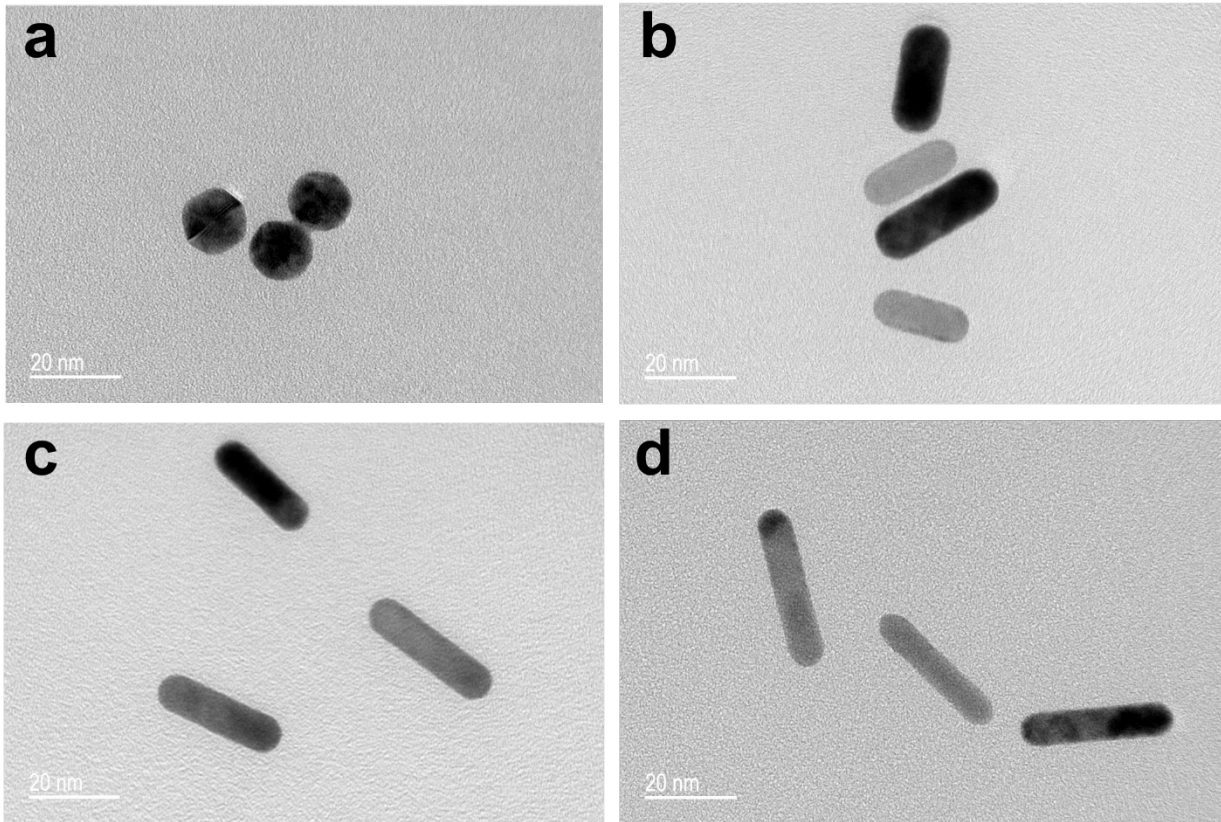

Figure S2. TEM images of (a) spheres and mini AuNRs of different aspect ratios: (b) 2.5, (c) 3.2 and (d) 4.1. Magnification 200kx, scale bars = 20 nm.

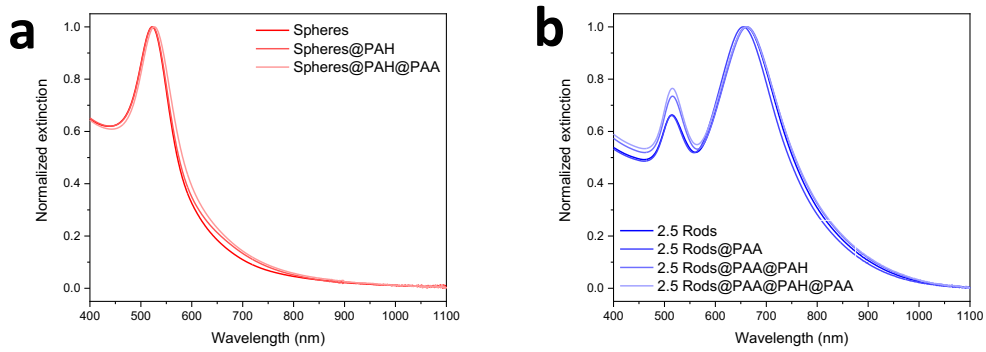

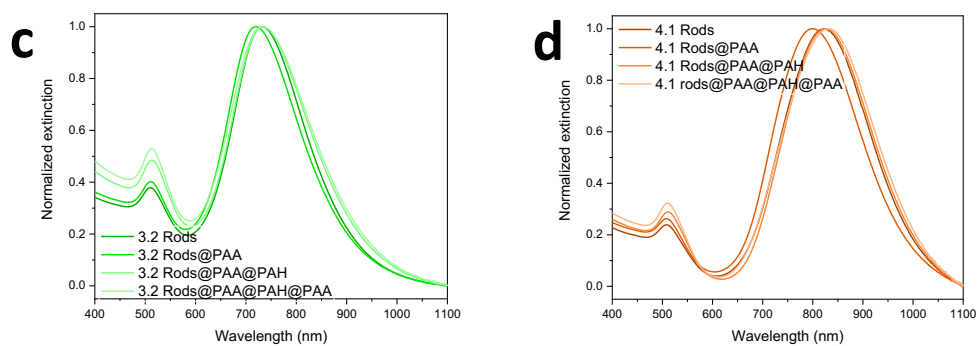

**Figure S3.** UV-vis-NIR spectra of each step of the coating procedure gold nanoparticles: (a) Spheres and mini AuNRs (b) 2.5, (c) 3.2 and (d) 4.1.

**Table S1.** Characterization of each step of the coating procedure of gold nanoparticles.

| Particle | Coating | SPR (nm) <sup>a</sup> | Hydrodynamic diameter | Zeta Potential |
|----------|---------|-----------------------|-----------------------|----------------|
|          |         |                       | (nm)                  | (mV)           |
| Spheres  | Citrate | 522                   | 45.1 ± 2.2            | -28.3 ± 2.1    |
|          | @PAH    | 523                   | 58.7 ± 1.0            | +47.6 ± 2.3    |
|          | @PAA    | 526                   | 67.5 ± 1.8            | -47.0 ± 0.2    |
| 2.5 Rods | CTAB    | 660                   | 30.8 ± 0.3            | +38.3 ± 1.6    |
|          | @PAA    | 655                   | 42.7 ± 0.5            | -54.8 ± 0.8    |
|          | @PAH    | 662                   | 66.4 ± 1.5            | +37.9 ± 1.2    |
|          | @PAA    | 661                   | 64.7 ± 0.3            | -28.7 ± 1.8    |
| 3.2 Rods | CTAB    | 733                   | 35.4 ± 0.3            | +36.6 ± 0.7    |
|          | @PAA    | 719                   | 58.7 ± 1.1            | -51.0 ± 0.5    |
|          | @PAH    | 734                   | 125.4 ± 0.4           | +53.3 ± 5.6    |
|          | @PAA    | 734                   | 119.6 ± 3.3           | -35.9 ± 3.3    |
| 4.1 Rods | CTAB    | 821                   | 43.8 ± 1.1            | +31.4 ± 2.2    |
|          | @PAA    | 799                   | 70.7 ± 3.6            | -51.9 ± 1.2    |
|          | @PAH    | 826                   | 109.5 ± 2.7           | +35.9 ± 2.8    |
|          | @PAA    | 833                   | 104.3 ± 0.2           | -42.4 ± 3.0    |

<sup>a</sup> Longitudinal surface plasmon resonance (LSPR) for rods.

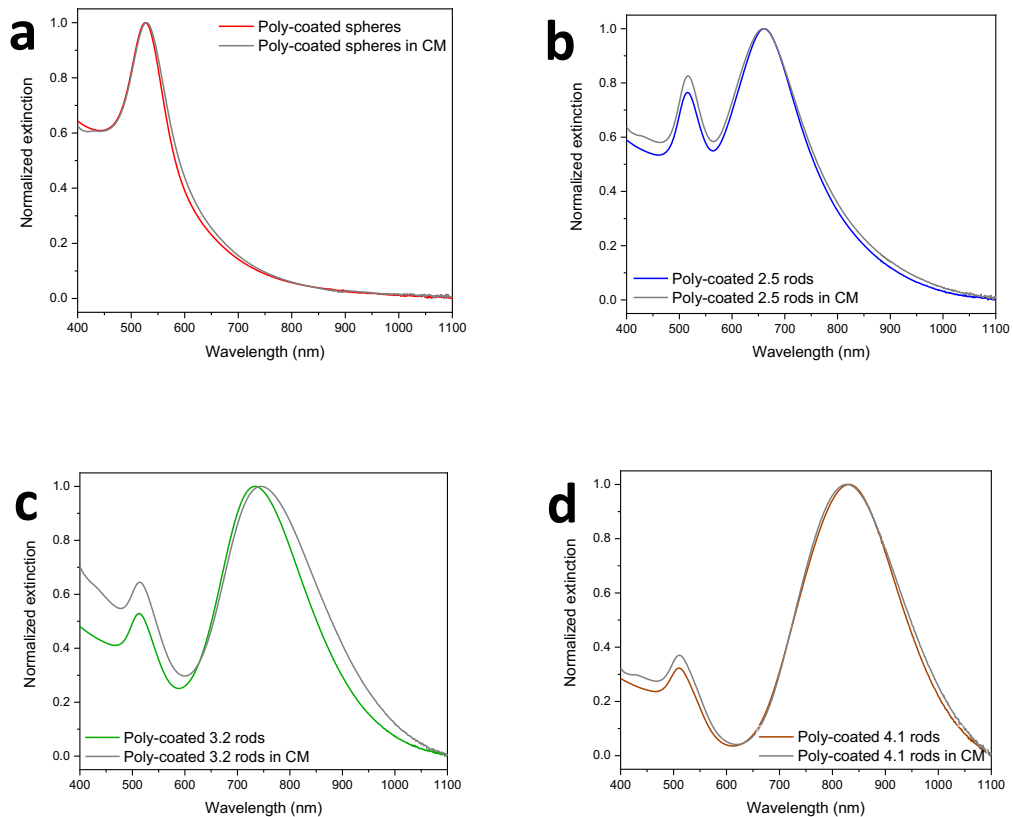

**Figure S4.** UV-vis-NIR spectra of gold nanoparticles in water and cell culture media: (a) Spheres and mini AuNRs (b) 2.5, (c) 3.2 and (d) 4.1.

**Table S2.** Characterization of the gold nanoparticle in water and cell culture media.

| <b>Particle</b>      | <b>Solvent</b> | <b>SPR (nm)<sup>a</sup></b> | <b>Hydrodynamic diameter (nm)</b> | <b>Zeta Potential (mV)</b> |
|----------------------|----------------|-----------------------------|-----------------------------------|----------------------------|
| Poly-coated spheres  | Water          | 526                         | 67.5 ± 1.8                        | -47.0 ± 0.2                |
|                      | Cell Medium    | 529                         | 96.2 ± 1.5                        | -17.4 ± 1.4                |
| Poly-coated 2.5 rods | Water          | 661                         | 64.6 ± 0.3                        | -28.7 ± 1.8                |
|                      | Cell Medium    | 660                         | 111.3 ± 1.0                       | -18.26 ± 1.0               |
| Poly-coated 3.2 rods | Water          | 734                         | 119.6 ± 3.3                       | -35.9 ± 3.3                |
|                      | Cell Medium    | 745                         | 214.6 ± 6.5                       | -18.4 ± 0                  |
| Poly-coated 4.1 rods | Water          | 833                         | 104.3 ± 0.2                       | -42.4 ± 3.0                |
|                      | Cell Medium    | 828                         | 155.6 ± 2.5                       | -20.8 ± 1.8                |

<sup>a</sup> Longitudinal surface plasmon resonance (LSPR) for rods

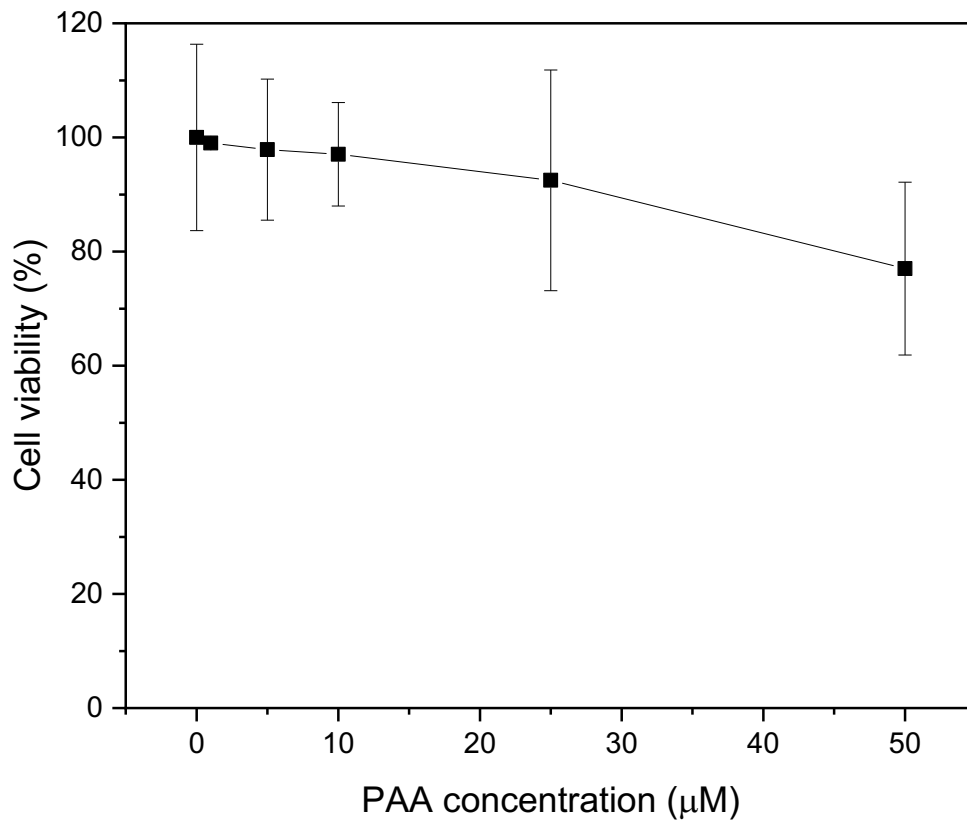

**Figure S5.** Cell viability assay for HDF cells exposed to PAA after 72 h Data were analyzed by one-way analysis of variance (ANOVA) followed by the Dunnett post hoc test, and  $p < 0.05$  was considered statistically significant,  $n = 3$ .

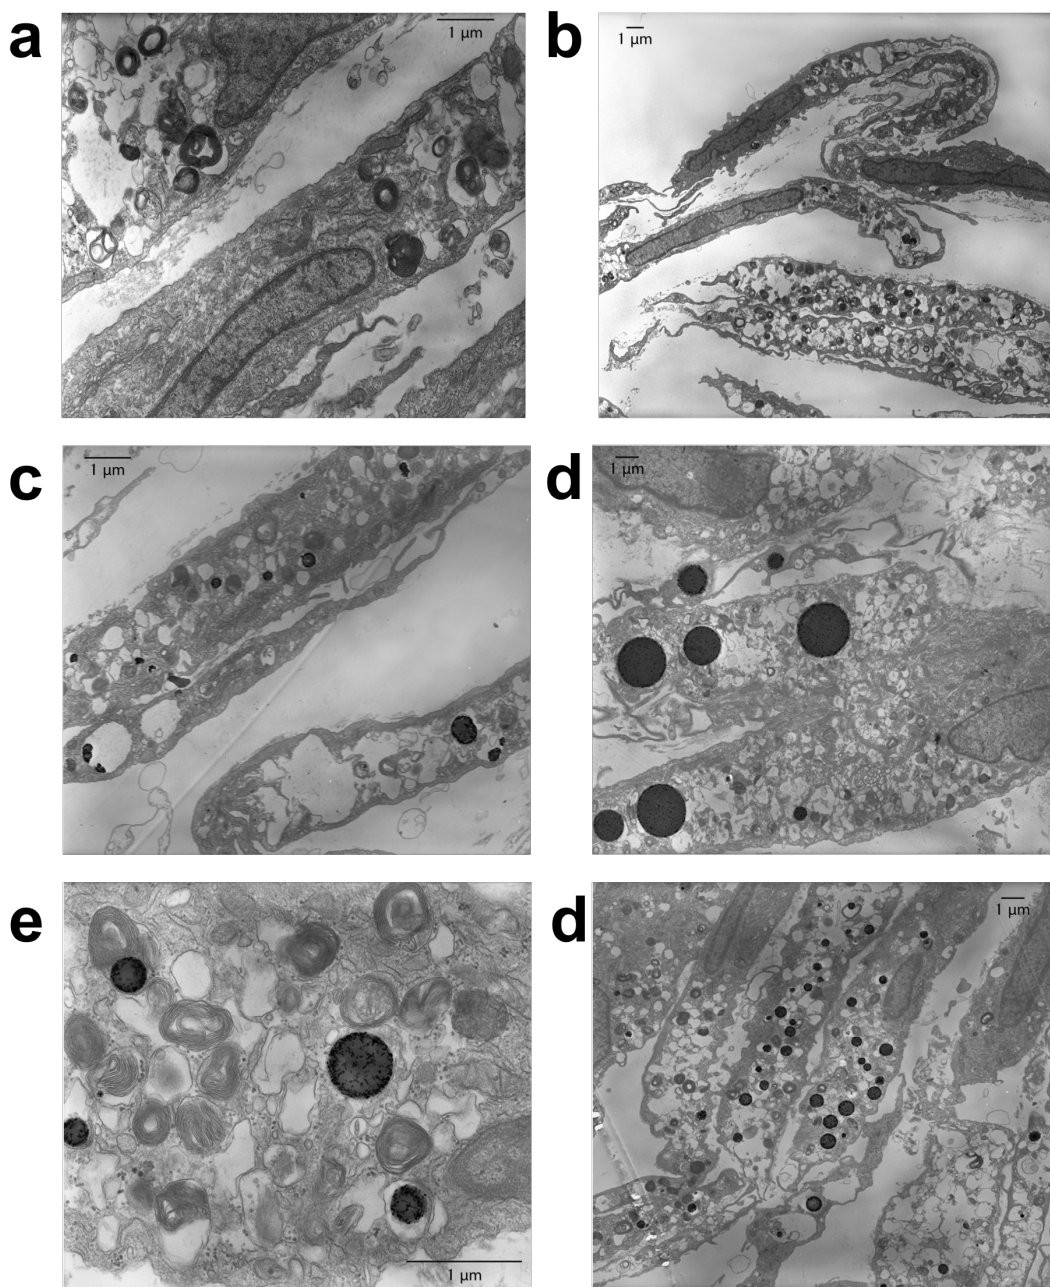

**Figure S6.** TEM images of HDF cells in the absence (a,b) and in presence of (c) spheres, and different aspect ratio mini gold nanorods 1nM: (d) 2.5 rods, (e) 3.2 rods, and (f) 4.1 rod.



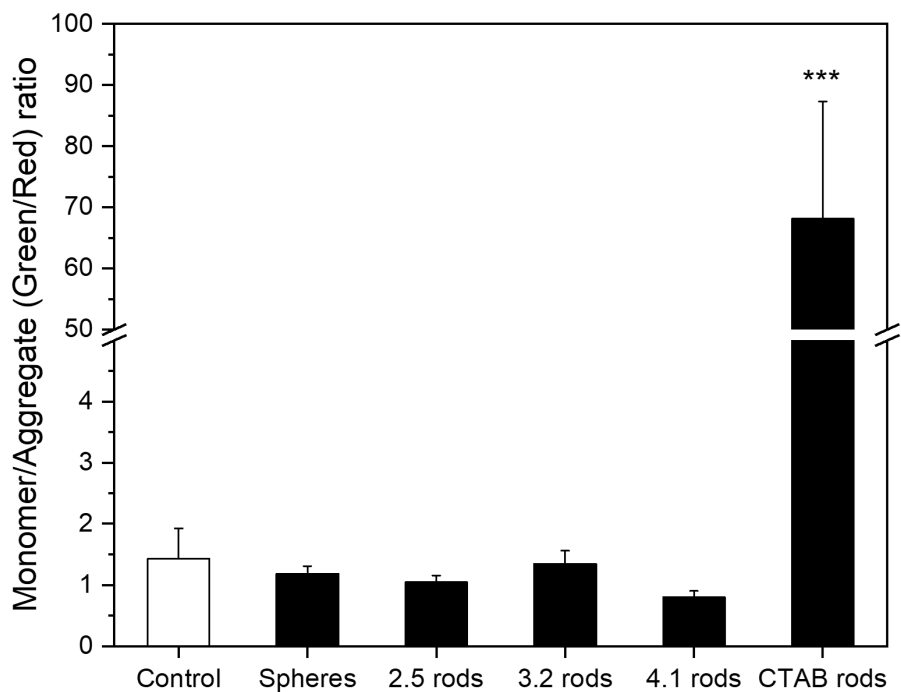

**Figure S7.** The effect of different polyelectrolyte-coated gold nanoparticles in the mitochondrial membrane potential (MMP) of HDF cells measured by JC1 dye. Quantification data of MMP in HDF cells. Data are means of three independent experiments. CTAB-rods (AR 2.5) were used to show the effect of non-coated AuNRs.

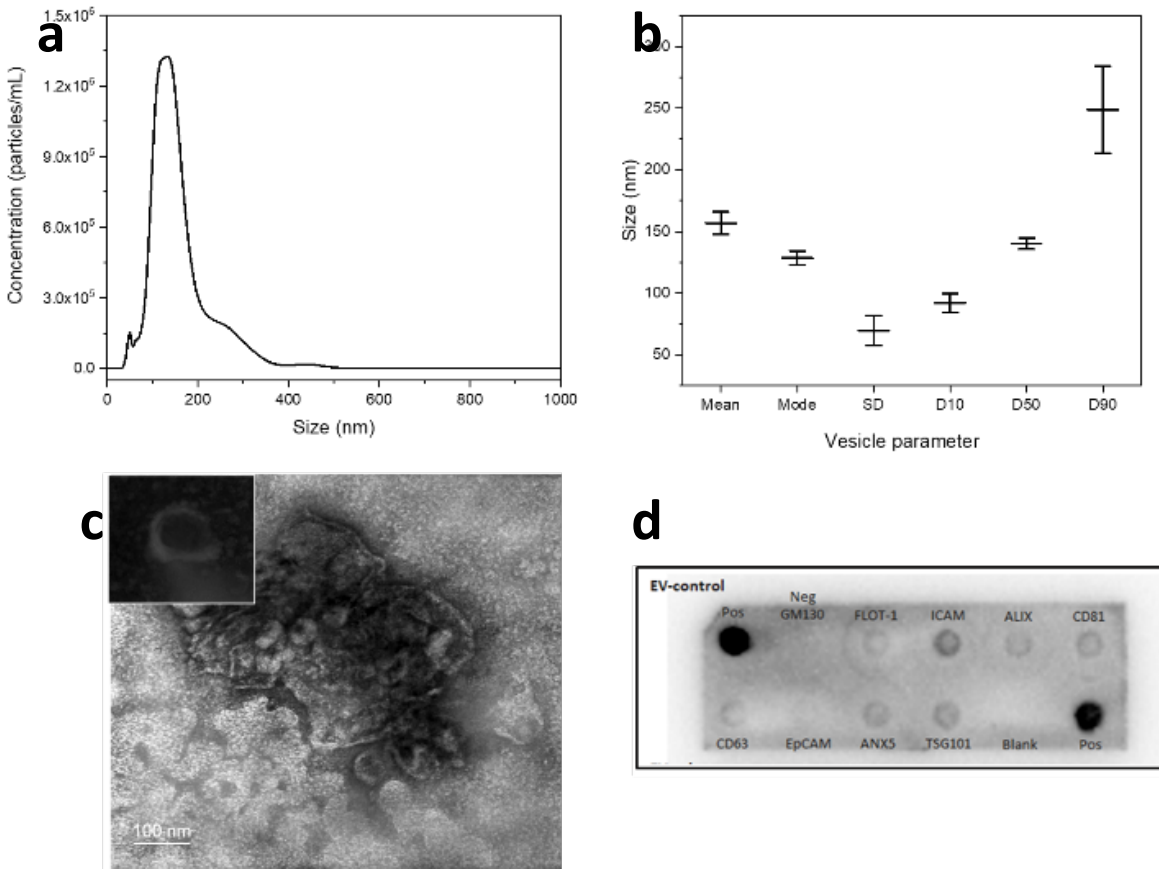

**Figure S8.** Extracellular Vesicles characterization. Nanoparticle tracking analysis showing size distribution of EVs (a) and (b) size characteristics: mean, mode, standard deviation, and different size distribution (D10, D50 and D90), n=3. Transmission electron micrographs of negative stained EVs (c) and EVs biomarkers verification (d).

**Table S3.** Sample absorbance at 260 and 280 nm

| Sample   | A260        | A280        | 260/280 |
|----------|-------------|-------------|---------|
| Control  | 2.20 ± 0.18 | 3.20 ± 0.33 | 0.68    |
| Spheres  | 2.91 ± 0.91 | 4.14 ± 1.47 | 0.70    |
| 2.5 rods | 2.65 ± 0.56 | 3.72 ± 0.97 | 0.71    |
| 3.2 rods | 2.19 ± 0.33 | 3.04 ± 0.47 | 0.72    |
| 4.1 rods | 2.19 ± 0.37 | 3.55 ± 1.27 | 0.61    |

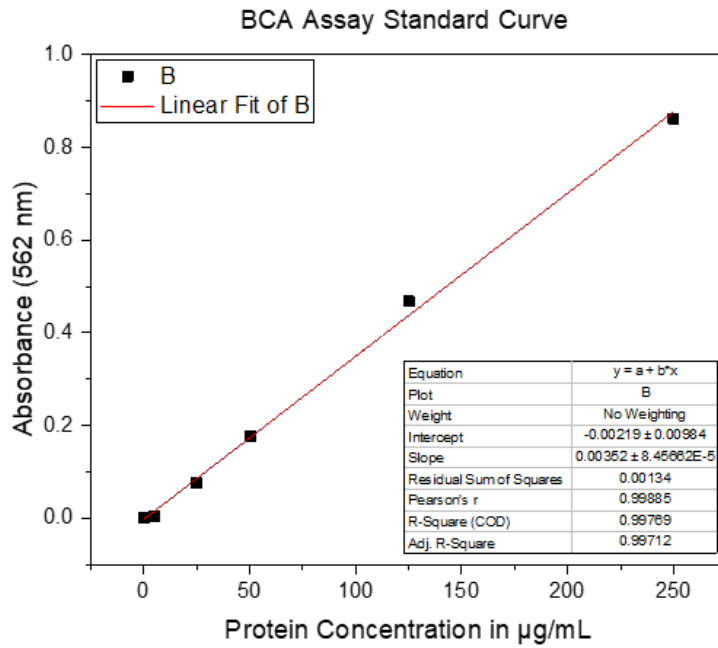

**Figure S9.** BCA assay standard curve (BSA 5 – 250 µg/mL)
